# Supplementary material for: Quantitative estimation of nanoparticle/substrate adhesion by atomic force microscopy
Source: publisher site journal article supplement (doi:10.3762/bjnano.17.1), 2026-01-02
Supplement: Additional file 1 [file 2190-4286-17-1-S1.pdf]

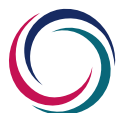

## Supporting Information

for

### **Quantitative estimation of nanoparticle/substrate adhesion by atomic force microscopy**

Aydan Çiçek, Markus Kratzer, Christian Teichert and Christian Mitterer

*Beilstein J. Nanotechnol.* **2026**, *17*, 1–14. [doi:10.3762/bjnano.17.1](https://doi.org/10.3762/bjnano.17.1)

### **AFM topography of manipulated Cu nanoparticles**

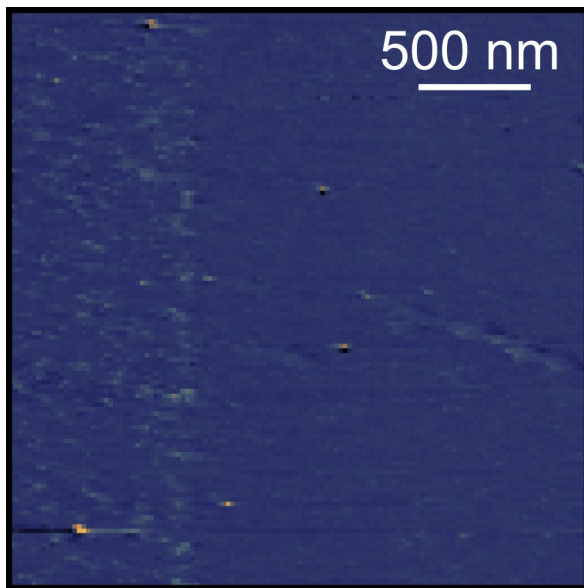

**Figure S1:** Cropped AFM topography image ( $5 \times 5 \mu\text{m}^2$ ) recorded on the same sample region as shown in Figure 2, z-scale of 14 nm. The image shows that displaced Cu NPs accumulate at the boundaries of the  $1 \times 1 \mu\text{m}^2$  scan area used during manipulation. The central area corresponds to the effective pushing path of the AFM tip, while NPs outside this scan region remain in their initial positions.
